# Supplementary material for: Cost-effectiveness of treatment optimisation with biomarkers for immunotherapy in solid tumours: a systematic review protocol
Source: HighWire-hosted journal article supplement (doi:10.1136/bmjopen-2020-048141), 2021-09-01
Supplement: bmjopen-2020-048141supp001_data_supplement.pdf [file bmjopen-2020-048141supp001_data_supplement.pdf]

## Appendix 1

### Search syntax in different databases

#### PubMed

(((((Antibodies, monoclonal[MeSH Terms]) OR (Antibodies, monoclonal[Title/Abstract])) OR ((immunotherapy[MeSH Terms]) OR (immunotherapy[Title/Abstract]))) OR ((nivolumab/ipilimumab[Title/Abstract]) OR ipilimumab[Title/Abstract]) OR durvalumab[Title/Abstract]) OR atezolizumab[Title/Abstract]) OR nivolumab[Title/Abstract]) OR pembrolizumab[Title/Abstract]) OR "Ipilimumab"[Mesh]) OR "durvalumab" [Supplementary Concept]) OR "avelumab" [Supplementary Concept]) OR "atezolizumab" [Supplementary Concept]) OR "Nivolumab"[Mesh]) OR "pembrolizumab" [Supplementary Concept]) OR "immune checkpoint inhibitor[Title/Abstract]) AND (((cancer[Title/Abstract]) OR (cancer[MeSH Terms])) OR ((carcinoma[Title/Abstract]) OR (carcinoma[MeSH Terms]))) OR ((neoplasm[Title/Abstract]) OR (neoplasm[MeSH Terms])) OR ((tumor[Title/Abstract]) OR (tumor[MeSH Terms])) OR ((tumour[Title/Abstract]) OR (tumour[MeSH Terms]))) AND (((((((((((PD1[Title/Abstract]) OR (PD1[MeSH Terms])) OR (Programmed Death 1[MeSH Terms])) OR (Programmed Death 1[Title/Abstract]) OR (PD-L1[Title/Abstract]) OR (PD-L1[MeSH Terms])) OR (Programmed Death Ligand 1[MeSH Terms])) OR (Programmed Death Ligand 1[Title/Abstract]) OR (IL-6[Title/Abstract]) OR (IL-6[MeSH Terms])) OR ((biomarker[Title/Abstract]) OR (biomarker[MeSH Terms]))) AND (((Target therapy [Title/Abstract]) OR (Target therapy [MeSH Terms])) OR ((Chemotherapy [Title/Abstract]) OR (Chemotherapy [MeSH Terms]))) AND (((((cost benefit analysis[Title/Abstract]) OR (cost benefit analysis[MeSH Terms])) OR ((cost effectiveness[MeSH Terms]) OR (cost effectiveness[Title/Abstract])) OR ((cost utility[Title/Abstract]) OR (cost utility[MeSH Terms])) OR ((economic evaluation[Title/Abstract]) OR (economic evaluation[MeSH

Terms]))) OR ((quality of life[Title/Abstract]) OR (quality of life[MeSH Terms]))) Sort by: Publication Date

### Embase

((('cost benefit analysis':ti,ab,kw OR 'cost benefit analysis'/exp) AND [embase]/lim OR (('cost effectiveness':ti,ab,kw OR 'cost effectiveness'/exp) AND [embase]/lim) OR (('cost utility':ti,ab,kw OR 'cost utility'/exp) AND [embase]/lim) OR (('economic evaluation':ti,ab,kw OR 'economic evaluation'/exp) AND [embase]/lim) OR (('quality of life':ti,ab,kw OR 'quality of life'/exp) AND [embase]/lim)) AND (('biomarkers':ti,ab,kw OR 'biomarkers'/exp OR 'pd1':ti,ab,kw OR 'pd1'/exp OR 'programmed death 1':ti,ab,kw OR 'programmed death 1'/exp OR 'pd-l1':ti,ab,kw OR 'pd-l1' OR 'programmed death ligand 1':ti,ab,kw OR 'programmed death ligand 1'/exp OR 'il-6':ti,ab,kw OR 'il-6'/exp OR 'interleukin-6':ti,ab,kw OR 'interleukin-6'/exp) OR ('target therapy': ti,ab,kw OR 'target therapy'/exp OR 'chemotherapy': ti,ab,kw OR 'chemotherapy'/exp) AND ('antibodies monoclonal':ti,ab,kw OR 'antibodies monoclonal'/exp) AND ('immunotherapy':ti,ab,kw OR 'immunotherapy'/exp) AND ('pembrolizumab':ti,ab,kw OR 'nivolumab/ipilimumab' OR 'ipilimumab' OR 'durvalumab' OR 'avelumab' OR 'atezolizumab' OR 'nivolumab' OR 'pembrolizumab'/exp) AND ('immune checkpoint inhibitor':ti,ab,kw OR 'immune checkpoint inhibitor'/exp) AND [embase]/lim AND (('neoplasms':ti,ab,kw OR 'neoplasms'/exp) AND [embase]/lim OR (('cancer':ti,ab,kw OR 'cancer'/exp) AND [embase]/lim OR (('tumor':ti,ab,kw OR 'tumor'/exp) AND [embase]/lim OR (('tumour':ti,ab,kw OR 'tumour'/exp) AND [embase]/lim) OR (('carcinoma':ti,ab,kw OR 'carcinoma'/exp) AND [embase]/lim))
